# Supplementary material for: TRPV3 and TRPV4 Ion Channels are Not Major Contributors to Mouse Heat Sensation
Source: Springer Nature journal article supplement (doi:10.1186/1744-8069-7-37), 2011-01-01

A

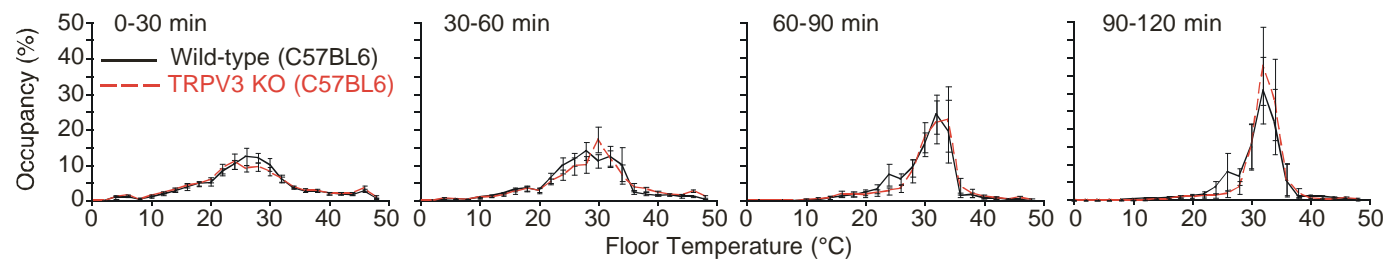

B

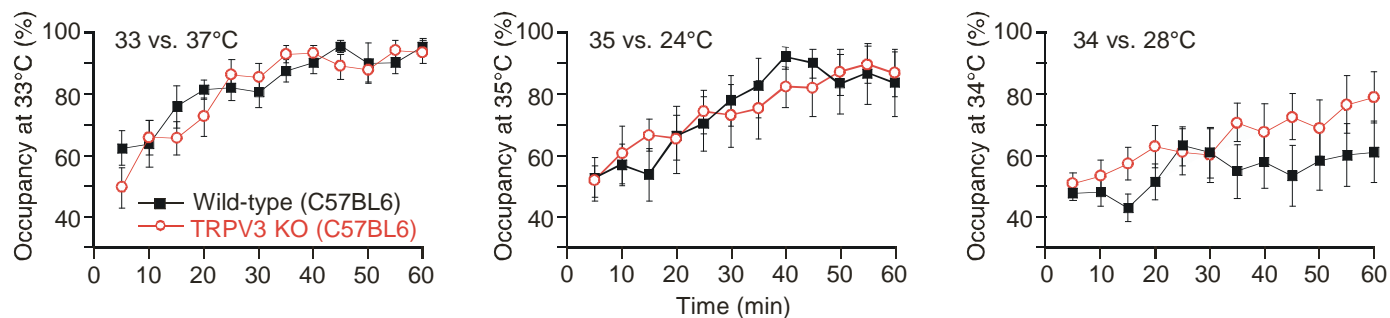

C

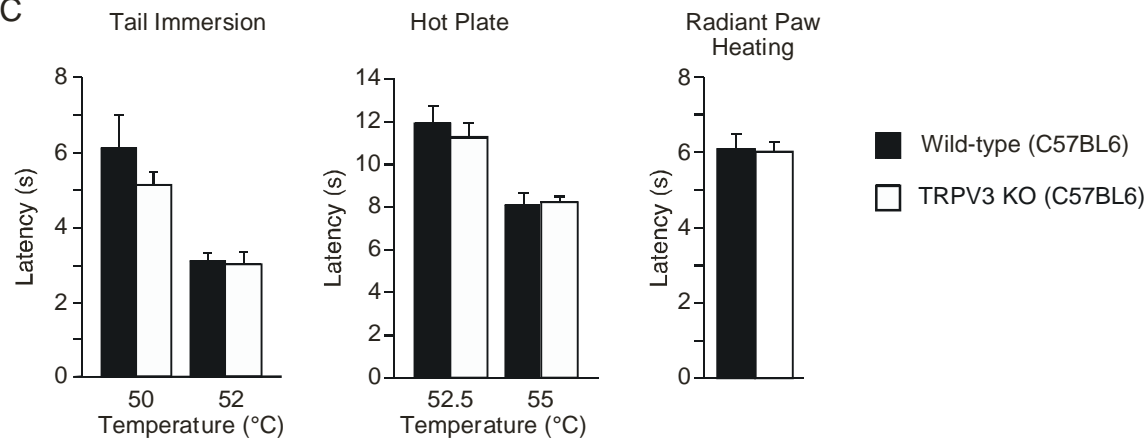

Supplement: 12990_2010_398_MOESM1_ESM.pdf [file 12990_2010_398_MOESM1_ESM.pdf]
